# Supplementary material for: The Enteric Nervous System is Essential for Functional Muscle Layer Formation in Small Bowel Bioengineering
Source: Research Square preprint supplement (doi:10.21203/rs.3.rs-6735240/v1), 2025-08-27
Supplement: Supplementary file 1 [file 37070472e84562c4821b1777.docx]

**Supplementary**

Figure S1. Isolation of ENS cells from the gut of postnatal rats (Sprague– Dawley) using enzymatic digestion combined with mechanical agitation: a – Laparotomy and collection of a bowel segment; b – Separation of the muscle layer from the submucosal layer; c – ENS-net after enzymatic digestion with Collagenase II; d – ENS cells after incubation with Trypsin-EDTA.

**Figure S2.** Tight contact visualization of a neuron and a muscleI cell growing together in tight contact in HyStem-C Hydrogel. The shape of each of the cells is very similar. Green (ß-Tubulin III) – neuron. Red (smooth muscle actin (SMA)) – muscle cell. a- overlay of green and red channels. b - green channel (neuron). c - red channel (muscle cell). d - 3D reconstruction of neuron and muscle cell. Confocal microscopy.
